# Supplementary material for: Identifying decadal trends in deweathered concentrations of criteria air pollutants in Canadian urban atmospheres with machine learning approaches
Source: Copernicus journal article supplement (doi:10.5194/egusphere-2023-2968), 2023-12-20

*Supplementary Information*

**Identifying decadal trends in deweathered concentrations of criteria air pollutants  
in Canadian urban atmospheres with machine learning approaches**

Xiaohong Yao, Leiming Zhang

\*Corresponds to: [xhyao@ouc.edu.cn](mailto:xhyao@ouc.edu.cn) and [leiming.zhang@ec.gc.ca](mailto:leiming.zhang@ec.gc.ca)

Table S1a. Sampling site and period information for NO<sub>2</sub> at ten Canadian cities.

| City      | Period    | Site ID | Latitude | Longitude | Note                                                                                       |
|-----------|-----------|---------|----------|-----------|--------------------------------------------------------------------------------------------|
| Halifax   | 1996-2017 | 30118   | 44.646   | -63.573   |                                                                                            |
| Montreal  | 1995-2019 | 50103   | 45.641   | -73.500   |                                                                                            |
| Quebec    | 1996-2019 | 50308   | 46.821   | -71.220   | Data collected at 50307 (Lat. 46.824, Long. -71.235) in 1996-1997 were used for data loss. |
| Toronto   | 2003-2019 | 60430   | 43.709   | -79.544   |                                                                                            |
| Hamilton  | 1996-2019 | 60512   | 43.258   | -79.862   |                                                                                            |
| Winnipeg  | 1984-2018 | 70119   | 49.898   | -97.147   |                                                                                            |
| Edmonton  | 1994-2019 | 90130   | 53.545   | -113.499  |                                                                                            |
| Calgary   | 1986-2007 | 90227   | 51.048   | -114.076  |                                                                                            |
| Vancouver | 1986-2019 | 100111  | 49.281   | -122.849  |                                                                                            |
| Victoria  | 1993-2019 | 100304  | 48.442   | -123.363  |                                                                                            |

Table S1b. Sampling site and period information for CO at ten Canadian cities.

| City      | Period    | Site ID | Latitude | Longitude | Note                                                                                                           |
|-----------|-----------|---------|----------|-----------|----------------------------------------------------------------------------------------------------------------|
| Halifax   | 1983-2019 | 30118   | 44.646   | -63.573   | Date collected at other three sites within 300 m were used in 1983-1985, 1986-1990 and 2017-2019 for data loss |
| Montreal  | 1995-2010 | 50103   | 45.641   | -73.500   |                                                                                                                |
| Quebec    | 1996-2019 | 50308   | 46.821   | -71.220   | Data collected at 50307 (Lat. 46.824, Long. -71.235) in 1996-1997 were used for data loss.                     |
| Toronto   | 2003-2019 | 60430   | 43.709   | -79.544   |                                                                                                                |
| Hamilton  | 2000-2019 | 60512   | 43.258   | -79.862   |                                                                                                                |
| Winnipeg  | 1982-2018 | 70119   | 49.898   | -97.147   |                                                                                                                |
| Edmonton  | 1981-2019 | 90130   | 53.545   | -113.499  |                                                                                                                |
| Calgary   | 1981-2015 | 90227   | 51.048   | -114.076  | Data collected at 90228 (Lat. 51.047, Long. -114.076) in 2009-2015 were used for data loss.                    |
| Vancouver | 1981-2019 | 100111  | 49.281   | -122.849  |                                                                                                                |
| Victoria  | 1998-2019 | 100304  | 48.442   | -123.363  |                                                                                                                |

Table S1c. Sampling site and period information for SO<sub>2</sub> at ten Canadian cities.

| City      | Period    | Site ID | Latitude | Longitude | Note                                                                                           |
|-----------|-----------|---------|----------|-----------|------------------------------------------------------------------------------------------------|
| Halifax   | 1982-2019 | 30118   | 44.646   | -63.573   | Data collected other two sites within 100 m were used in 1982-1999 and 2019 for the data loss. |
| Montreal  | 1995-2010 | 50103   | 45.641   | -73.500   |                                                                                                |
| Quebec    | 1996-2019 | 50308   | 46.821   | -71.220   | Data collected at 50307 (Lat. 46.824, Long. -71.235) in 1996-1997 were used for data loss.     |
| Toronto   | 2003-2019 | 60430   | 43.709   | -79.544   |                                                                                                |
| Hamilton  | 1996-2019 | 60512   | 43.258   | -79.862   |                                                                                                |
| Winnipeg  | 1987-2018 | 70119   | 49.898   | -97.147   |                                                                                                |
| Edmonton  | 1987-2019 | 90121   | 53.545   | -113.499  |                                                                                                |
| Calgary   | 1983-2010 | 90218   | 51.009   | -114.025  |                                                                                                |
| Vancouver | 1981-2019 | 100111  | 49.281   | -122.849  |                                                                                                |
| Victoria  | 1998-2019 | 100304  | 48.442   | -123.363  |                                                                                                |

Table S1d. Sampling site and period information for O<sub>3</sub> at ten Canadian cities.

| City      | Period    | Site ID | Latitude | Longitude | Note                                                                                       |
|-----------|-----------|---------|----------|-----------|--------------------------------------------------------------------------------------------|
| Halifax   | 2000-2017 | 30118   | 44.646   | -63.573   |                                                                                            |
| Montreal  | 1995-2019 | 50103   | 45.641   | -73.500   |                                                                                            |
| Quebec    | 1995-2019 | 50308   | 46.821   | -71.220   | Data collected at 50307 (Lat. 46.824, Long. -71.235) in 1995-1997 were used for data loss. |
| Toronto   | 2003-2019 | 60430   | 43.709   | -79.544   |                                                                                            |
| Hamilton  | 1987-2019 | 60512   | 43.258   | -79.862   |                                                                                            |
| Winnipeg  | 1982-2018 | 70119   | 49.898   | -97.147   |                                                                                            |
| Edmonton  | 1981-2019 | 90130   | 53.545   | -113.499  |                                                                                            |
| Calgary   | 1982-2015 | 90227   | 51.048   | -114.076  | Data collected at 90228 (Lat. 51.047, Long. -114.076) were used in 2009-2015 for data loss |
| Vancouver | 1981-2019 | 100111  | 49.281   | -122.849  |                                                                                            |
| Victoria  | 1998-2019 | 100304  | 48.442   | -123.363  |                                                                                            |

Table S1f. Sampling site and period information for PM<sub>2.5</sub> at ten Canadian cities.

| City      | Period    | Site ID | Latitude | Longitude | Note                                                                                    |
|-----------|-----------|---------|----------|-----------|-----------------------------------------------------------------------------------------|
| Halifax   | 2006-2019 | 30113   | 44.647   | -63.574   |                                                                                         |
| Montreal  | 2004-2019 | 50103   | 45.641   | -73.500   |                                                                                         |
| Quebec    | 1998-2019 | 50308   | 46.821   | -71.221   |                                                                                         |
| Toronto   | 2000-2019 | 60430   | 43.709   | -79.544   |                                                                                         |
| Hamilton  | 1998-2019 | 60512   | 43.258   | -79.862   |                                                                                         |
| Winnipeg  | 1995-2018 | 70119   | 49.898   | -97.147   |                                                                                         |
|           |           |         |          |           |                                                                                         |
| Edmonton  | 1998-2019 | 90130   | 53.545   | -113.499  |                                                                                         |
| Calgary   | 1998-2014 | 90227   | 51.048   | -114.076  | Data collected at 90228 (Lat. 51.047, Long. -114.076) in 2009-2014 were used after 2009 |
| Vancouver | 2003-2019 | 100111  | 49.281   | -122.849  |                                                                                         |
| Victoria  | 1998-2019 | 100304  | 48.444   | -123.363  |                                                                                         |

Table S2. Correlations between deweathered CO mixing ratios and its original annual averages together with their correlations with provincial grand total and transportation CO emissions, and the decreasing extents of the variables in ten Canadian cities during the last decades (& decreasing trends were always obtained with P<0.05 except in Montreal; &&Provincial grand total and transportation CO emission decreasing percentage; # P>0.05; ## since 1990; R<sup>2</sup>>0.8 was highlighted in purple).

| City                  | Correlation with original annual average (P<0.01) |              | Annual decreasing rate and overall decreasing percentage (unit: ppm year <sup>-1</sup> , %) & |              |              | R <sup>2</sup> values between different types of mixing ratios with provincial total and transportation CO emissions (P<0.05) |               |               | Emission decreasing percentage (total, transportation; unit: %)&& |
|-----------------------|---------------------------------------------------|--------------|-----------------------------------------------------------------------------------------------|--------------|--------------|-------------------------------------------------------------------------------------------------------------------------------|---------------|---------------|-------------------------------------------------------------------|
|                       | BRTs                                              | RF           | BRTs                                                                                          | RF           | original     | BRTs                                                                                                                          | RF            | original      |                                                                   |
| Halifax (1984-2019)   | y=1.01*<br>x                                      | y=1.07*<br>x | 0.029,<br>90                                                                                  | 0.030,<br>90 | 0.029,<br>92 | 0.83,<br>0.81                                                                                                                 | 0.86,<br>0.83 | 0.77,<br>0.75 | 58, 63##                                                          |
| Montreal (1995-2010)  | y=1.03*<br>x                                      | y=1.03*<br>x | /#                                                                                            | /#           | /#           | /#                                                                                                                            | /#            | /#            | 37, 53                                                            |
| Quebec (1996-2019)    | y=1.07*<br>x                                      | y=1.12*<br>x | 0.013,<br>56                                                                                  | 0.014,<br>56 | 0.010,<br>58 | 0.94,<br>0.93                                                                                                                 | 0.93,<br>0.93 | 0.83,<br>83   | 42, 60                                                            |
| Toronto (2000-2019)   | y=0.92*<br>x                                      | y=0.99*<br>x | 0.041,<br>84                                                                                  | 0.046,<br>83 | 0.048,<br>86 | 0.71,<br>69                                                                                                                   | 0.71,<br>0.69 | 0.70,<br>0.68 | 59, 62                                                            |
| Hamilton (2000-2019)  | y=1.03*<br>x                                      | y=1.03*<br>x | 0.021,<br>70                                                                                  | 0.021,<br>66 | 0.019,<br>68 | 0.80,<br>0.79                                                                                                                 | 0.80-<br>0.79 | 0.72,<br>0.71 | 59, 62                                                            |
| Winnipeg (1982-2018)  | y=0.97*<br>x                                      | y=1.01*<br>x | 0.019,<br>84                                                                                  | 0.020,<br>84 | 0.020,<br>88 | 0.91,<br>0.91                                                                                                                 | 0.90,<br>0.90 | 0.84,<br>0.85 | 55, 55##                                                          |
| Edmonton (1981-2019)  | y=0.98*<br>x                                      | y=1.02*<br>x | 0.048,<br>86                                                                                  | 0.046,<br>86 | 0.048,<br>86 | 0.74,<br>0.82                                                                                                                 | 0.73,<br>0.82 | 0.76,<br>0.83 | 45, 62##                                                          |
| Calgary (1981-2013)   | y=1.01*<br>x                                      | y=1.07*<br>x | 0.064,<br>90                                                                                  | 0.067,<br>90 | 0.063,<br>91 | 0.76,<br>0.91                                                                                                                 | 0.75,<br>0.88 | 0.78,<br>0.89 | 42, 59##                                                          |
| Vancouver (1981-2019) | y=1.00*<br>x                                      | y=1.03*<br>x | 0.026,<br>82                                                                                  | 0.027,<br>82 | 0.026,<br>83 | 0.96,<br>0.85                                                                                                                 | 0.96,<br>0.87 | 0.96,<br>0.86 | 71, 53##                                                          |
| Victoria (1999-2019)  | y=1.01*<br>x                                      | y=1.05*<br>x | 0.011,<br>57                                                                                  | 0.012,<br>59 | 0.010,<br>58 | 0.91,<br>0.89                                                                                                                 | 0.90,<br>0.89 | 0.84,<br>0.82 | 62, 56                                                            |

Table S3. Correlations between deweathered SO<sub>2</sub> mixing ratios and its original annual averages together with their correlations with provincial grand total SO<sub>2</sub> emissions, and the decreasing extents of the variables in ten Canadian cities during the last decades (& decreasing trends were always obtained with P<0.05; &&Provincial grand total SO<sub>2</sub> emission decreasing percentage; ^ since 1990; # P>0.05; bond number represents lower decreasing percentage of SO<sub>2</sub> mixing ratios than that of provincial total grand SO<sub>2</sub> emissions; R<sup>2</sup>>0.8 was highlighted in purple).

| City                  | Correlation with original annual average ( P<0.01) |              | Annual decreasing rate and overall decreasing percentage (unit: ppb year <sup>-1</sup> , %) & |                    |                    | R <sup>2</sup> values between different types of mixing ratios with provincial grand total SO <sub>2</sub> emissions (P<0.05) |      |          | Emission decreasing percentage (total grand, unit: %)&& |
|-----------------------|----------------------------------------------------|--------------|-----------------------------------------------------------------------------------------------|--------------------|--------------------|-------------------------------------------------------------------------------------------------------------------------------|------|----------|---------------------------------------------------------|
|                       | BRTs                                               | RF           | BRTs                                                                                          | RF                 | original           | BRTs                                                                                                                          | RF   | original |                                                         |
| Halifax (2000-2019)   | y=1.00*<br>x                                       | y=1.08<br>*x | 0.63,<br>93                                                                                   | 0.61,<br>90        | 0.59,<br>93        | 0.89                                                                                                                          | 0.92 | 0.80     | 72                                                      |
| Montreal (1995-2010)  | y=1.14*<br>x                                       | y=1.02<br>*x | 0.37,<br>86                                                                                   | 0.35,<br>86        | 0.34,<br>79        | 0.86                                                                                                                          | 0.82 | 0.82     | 76                                                      |
| Quebec (1996-2019)    | y=0.96*<br>x                                       | y=1.05<br>*x | 0.10,<br>85                                                                                   | 0.11,<br>78        | 0.11,<br>79        | 0.68                                                                                                                          | 0.70 | 0.65     | 75                                                      |
| Toronto (2003-2019)   | y=1.03*<br>x                                       | y=1.13<br>*x | 0.16,<br>95                                                                                   | 0.17,<br>89        | 0.15,<br>90        | 0.84                                                                                                                          | 0.89 | 0.85     | 79                                                      |
| Hamilton (1996-2019)  | y=1.01*<br>x                                       | y=0.99<br>*x | 0.09,<br><b>23</b>                                                                            | 0.08,<br><b>27</b> | 0.10,<br><b>28</b> | 0.57                                                                                                                          | 0.51 | 0.42     | <b>81</b>                                               |
| Winnipeg (1987-2018)  | y=1.04*<br>x                                       | y=1.16<br>*x | 0.06,<br>96                                                                                   | 0.07,<br>97        | 0.06,<br>95        | 0.91                                                                                                                          | 0.85 | 0.90     | 92 <sup>^</sup>                                         |
| Edmonton (1987-2019)  | y=1.00*<br>x                                       | y=1.05<br>*x | 0.07,<br>55                                                                                   | 0.07,<br>53        | 0.07,<br>52        | 0.80                                                                                                                          | 0.81 | 0.73     | 57 <sup>^</sup>                                         |
| Calgary (1983-2010)   | y=1.00*<br>x                                       | y=1.04<br>*x | 0.09,<br>62                                                                                   | 0.10,<br>62        | 0.09,<br>64        | 0.83                                                                                                                          | 0.84 | 0.80     | 30 <sup>^</sup>                                         |
| Vancouver (1982-2019) | y=0.98*<br>x                                       | y=1.02<br>*x | 0.11,<br>90                                                                                   | 0.11,<br>91        | 0.12,<br>95        | 0.41                                                                                                                          | 0.40 | /#       | 38 <sup>^</sup>                                         |
| Victoria (1999-2019)  | y=1.00*<br>x                                       | y=1.08<br>*x | 0.05,<br>80                                                                                   | 0.05,<br>73        | 0.04,<br>82        | /#                                                                                                                            | /#   | /#       | /#                                                      |

Table S4. Correlations between deweathered O<sub>3</sub> (NO<sub>2</sub>+O<sub>3</sub>) and its original annual averages, and their increasing or decreasing extents in ten Canadian cities during the last decades (# P<0.05; ##P>0.05; & 1996-2019 in Quebec and Hamilton, 1994-2019 in Edmonton, 1986-2010 in Calgary).

| City                  | O <sub>3</sub> mixing ratio                       |              |                                                                                                      |             |          | NO <sub>2</sub> +O <sub>3</sub> mixing ratio      |              |                                                                                                      |             |           |
|-----------------------|---------------------------------------------------|--------------|------------------------------------------------------------------------------------------------------|-------------|----------|---------------------------------------------------|--------------|------------------------------------------------------------------------------------------------------|-------------|-----------|
|                       | Correlation with original annual average (P<0.01) |              | Annual <b>increasing</b> rate and overall increase (unit: ppb year <sup>-1</sup> , ppb) <sup>#</sup> |             |          | Correlation with original annual average (P<0.01) |              | Annual <b>decreasing</b> rate and overall decrease (unit: ppb year <sup>-1</sup> , ppb) <sup>#</sup> |             |           |
|                       | BRTs                                              | RF           | BRTs                                                                                                 | RF          | Original | BRTs                                              | RF           | BRTs                                                                                                 | RF          | Original  |
| Halifax (2000-2017)   | y=0.98*<br>x                                      | y=0.98<br>*x | /##                                                                                                  | /##         | /##      | y=1.00*<br>x                                      | y=1.03*<br>x | 0.51,<br>10                                                                                          | 0.52,<br>10 | 0.62, 10  |
| Montreal (1997-2010)  | y=0.97*<br>x                                      | y=0.98<br>*x | 0.13,<br>3                                                                                           | 0.12,<br>3  | 0.16, 4  | y=1.00*<br>x                                      | y=1.00*<br>x | 0.23, 4                                                                                              | 0.22, 4     | 0.22, 4   |
| Quebec (1995-2019)    | y=1.01*<br>x                                      | y=1.01<br>*x | 0.33,<br>7                                                                                           | 0.34,<br>7  | 0.27, 6  | y=1.00*<br>x                                      | y=1.00*<br>x | 0.15&,<br>1                                                                                          | 0.14&,<br>1 | 0.13&, 1  |
| Toronto (2003-2019)   | y=0.96*<br>x                                      | y=0.95<br>*x | 0.10,<br>2                                                                                           | 0.14,<br>2  | 0.22, 3  | y=1.00*<br>x                                      | y=1.00*<br>x | 0.62,<br>10                                                                                          | 0.62,<br>10 | 0.59, 10  |
| Hamilton (1996-2019)  | y=1.00*<br>x                                      | y=1.01<br>*x | 0.32,<br>8                                                                                           | 0.31,<br>8  | 0.35, 8  | y=1.00*<br>x                                      | y=1.00*<br>x | 0.21&,<br>3                                                                                          | 0.19&,<br>3 | 0.21&, 3  |
| Winnipeg (1985-2018)  | y=0.98*<br>x                                      | y=0.98<br>*x | 0.24,<br>5                                                                                           | 0.25,<br>5  | 0.25, 7  | y=1.00*<br>x                                      | y=1.00*<br>x | 0.14, 6                                                                                              | 0.14, 6     | 0.17, 6   |
| Edmonton (1981-2019)  | y=1.00*<br>x                                      | y=1.01<br>*x | 0.16,<br>10                                                                                          | 0.17,<br>10 | 0.17, 10 | y=1.00*<br>x                                      | y=1.01*<br>x | 0.28&,<br>8                                                                                          | 0.30&,<br>9 | 0.33&, 10 |
| Calgary (1986-2014)   | y=1.00*<br>x                                      | y=1.01<br>*x | 0.26,<br>8                                                                                           | 0.27,<br>8  | 0.24, 8  | y=1.00*<br>x                                      | y=1.01*<br>x | 0.37&,<br>6                                                                                          | 0.41&,<br>6 | 0.42&, 6  |
| Vancouver (1986-2019) | y=0.99*<br>x                                      | y=1.02<br>*x | 0.11, 2                                                                                              | 0.10,<br>2  | 0.11, 2  | y=1.00*<br>x                                      | y=1.01*<br>x | 0.30,<br>12                                                                                          | 0.29,<br>11 | 0.28, 10  |
| Victoria (1999-2019)  | y=1.00*<br>x                                      | y=0.99<br>*x | 0.20,<br>2                                                                                           | 0.19,<br>2  | 0.16, 1  | y=0.99*<br>x                                      | y=0.99*<br>x | /##                                                                                                  | /##         | /##       |

Fig. S1. Time series of PM<sub>2.5</sub> concentrations during two large wildfire periods in Edmonton.

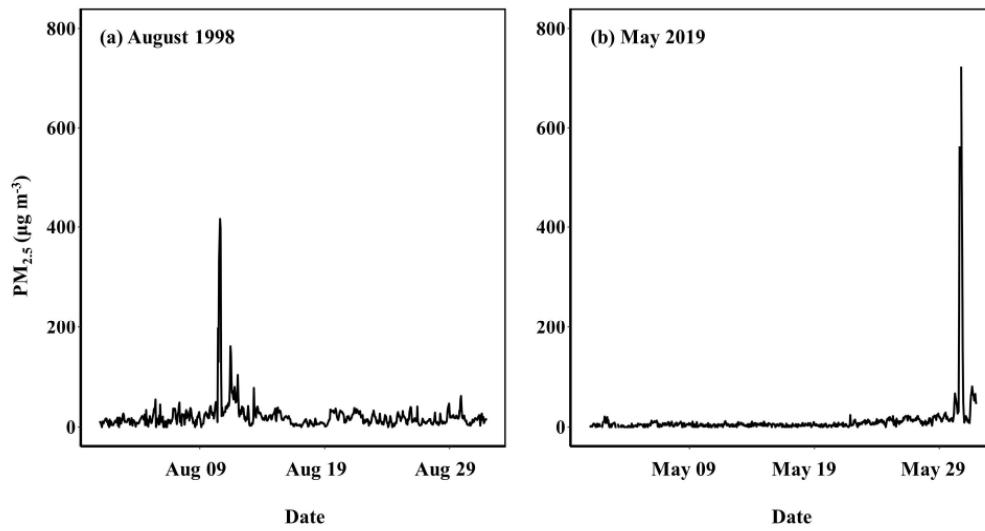



Fig. S2. BRTs-deweathered and RF-deweathered hourly mixing ratios of NO<sub>2</sub> in ten Canadian cities.

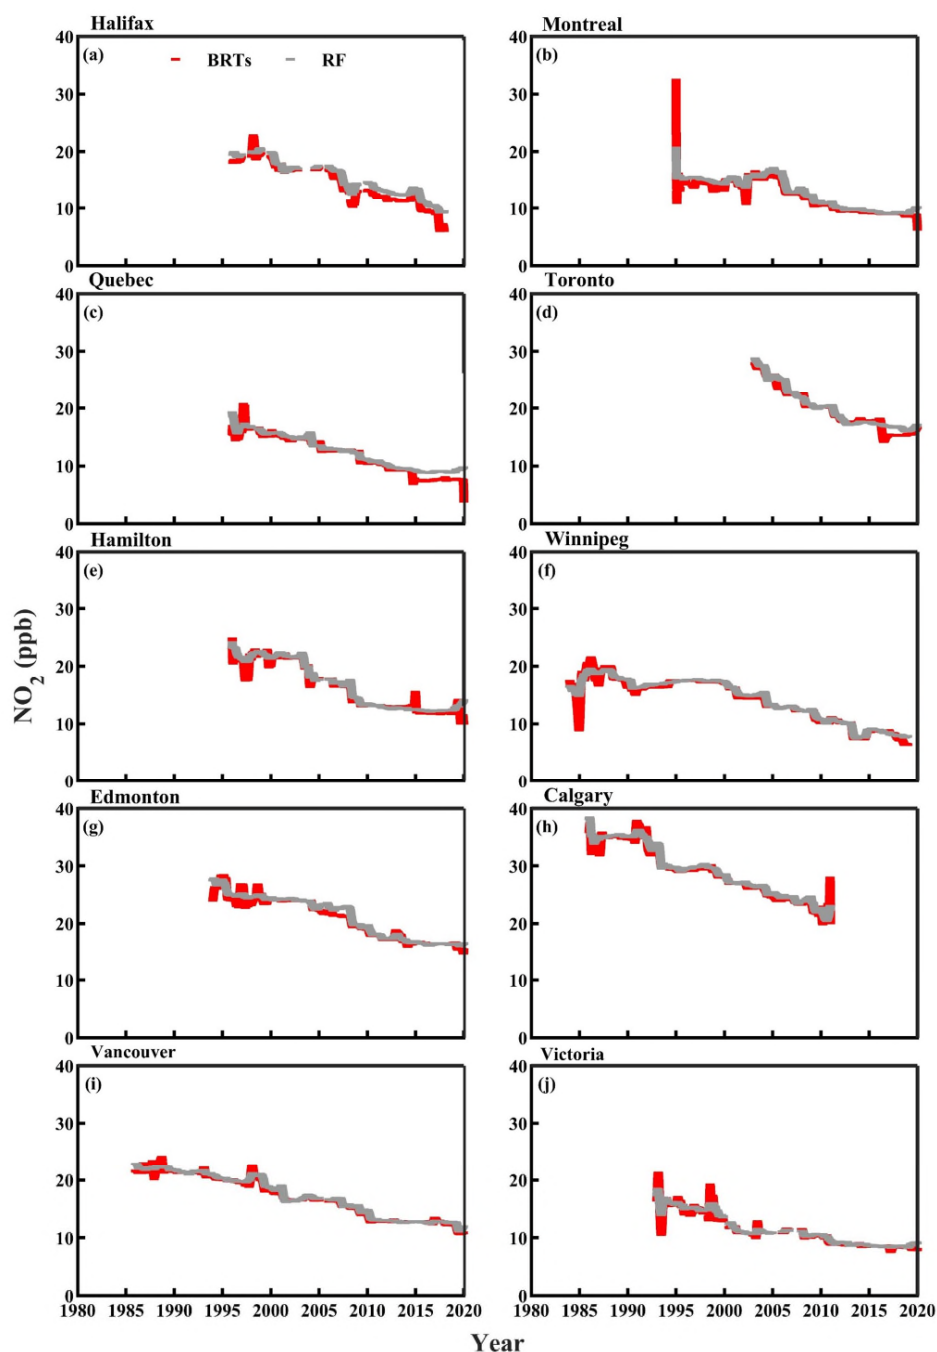

Note: In theory, the deweathered values should be invariant in absence of mitigation of NO<sub>x</sub> in one or several consecutive years. In reality, the deweathered values showed a step-wise decrease due to the implemented air pollution control measures, as can be seen in Figures a–j. The spikes were probably associated with unpredictably increased emissions of NO<sub>x</sub>, e.g., in January of 1995 in Montreal (Figure b); the trough might be associated with unpredictably decreased emissions of NO<sub>x</sub>, e.g., in January of 1985 in Winnipeg (Figure f). BRTs-deweathered values apparently captured, but RF-deweathered values did not capture the unpredictably increased or decreased emissions.

Fig. S3. Correlations of BRTs-deweathered and RF-deweathered annual averages of NO<sub>2</sub> and PM<sub>2.5</sub> with their respective original annual averages in Halifax ((a): NO<sub>2</sub>; (b): PM<sub>2.5</sub>).

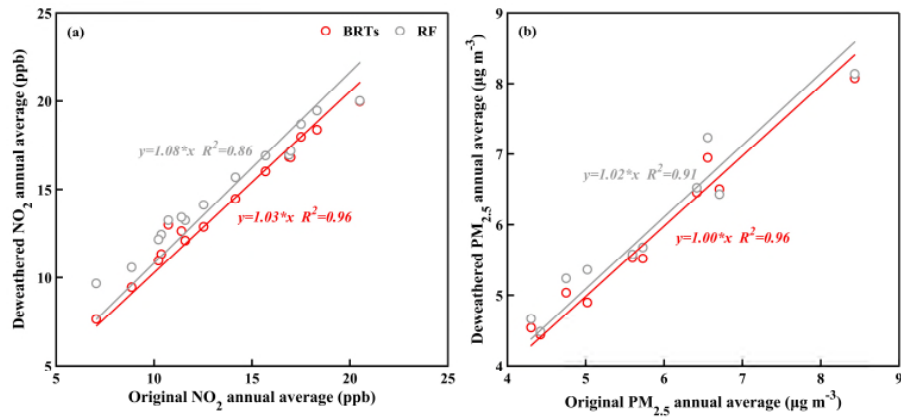

Fig. S4. Trends in original annual averages of CO and SO<sub>2</sub> in five eastern (top row) and five western (bottom row) Canadian cities.

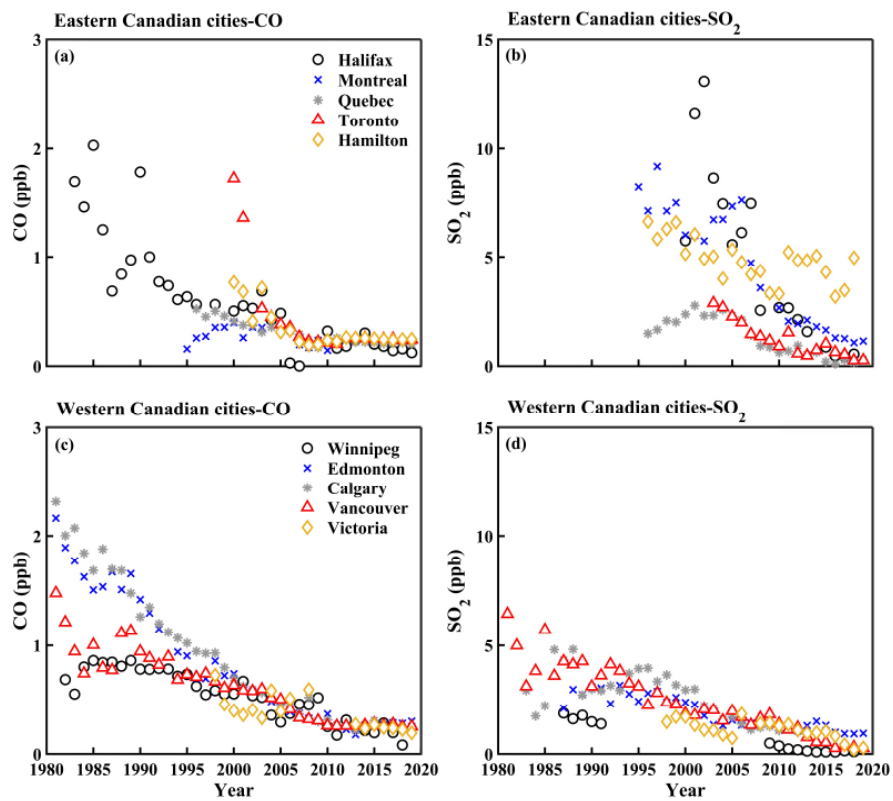

Fig. S5. Trends in original annual averages of  $O_3$  and  $NO_2+O_3$  in five eastern (top row) and five western (bottom row) Canadian cities.

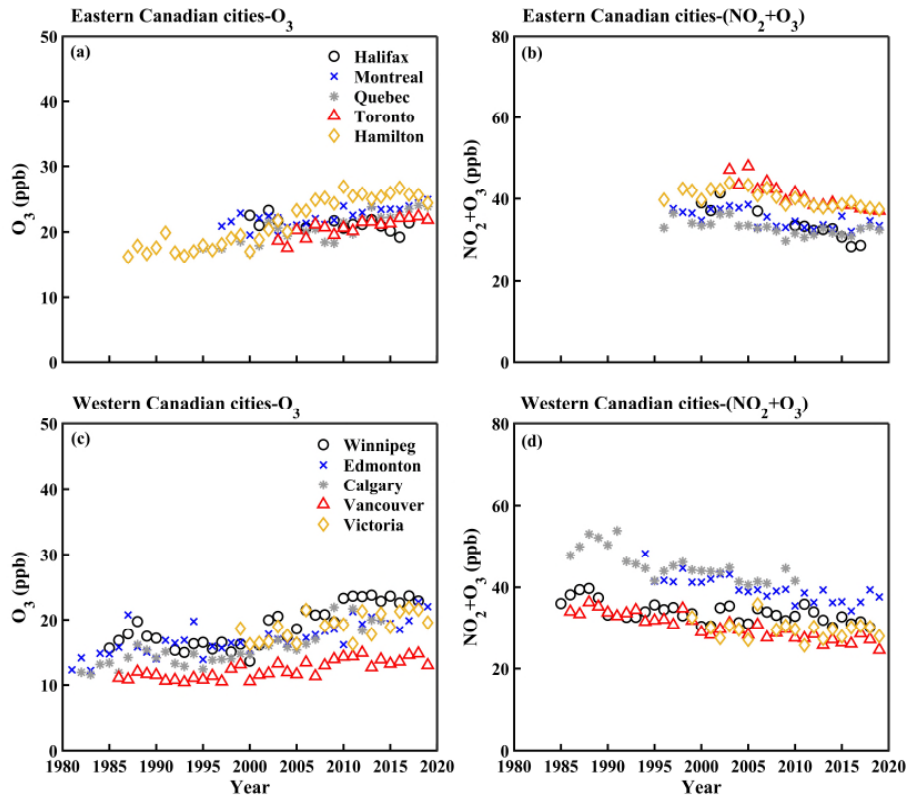

Fig. S6. BRTs-deweathered and RF-deweathered hourly mass concentrations of PM<sub>2.5</sub> in ten Canadian cities.

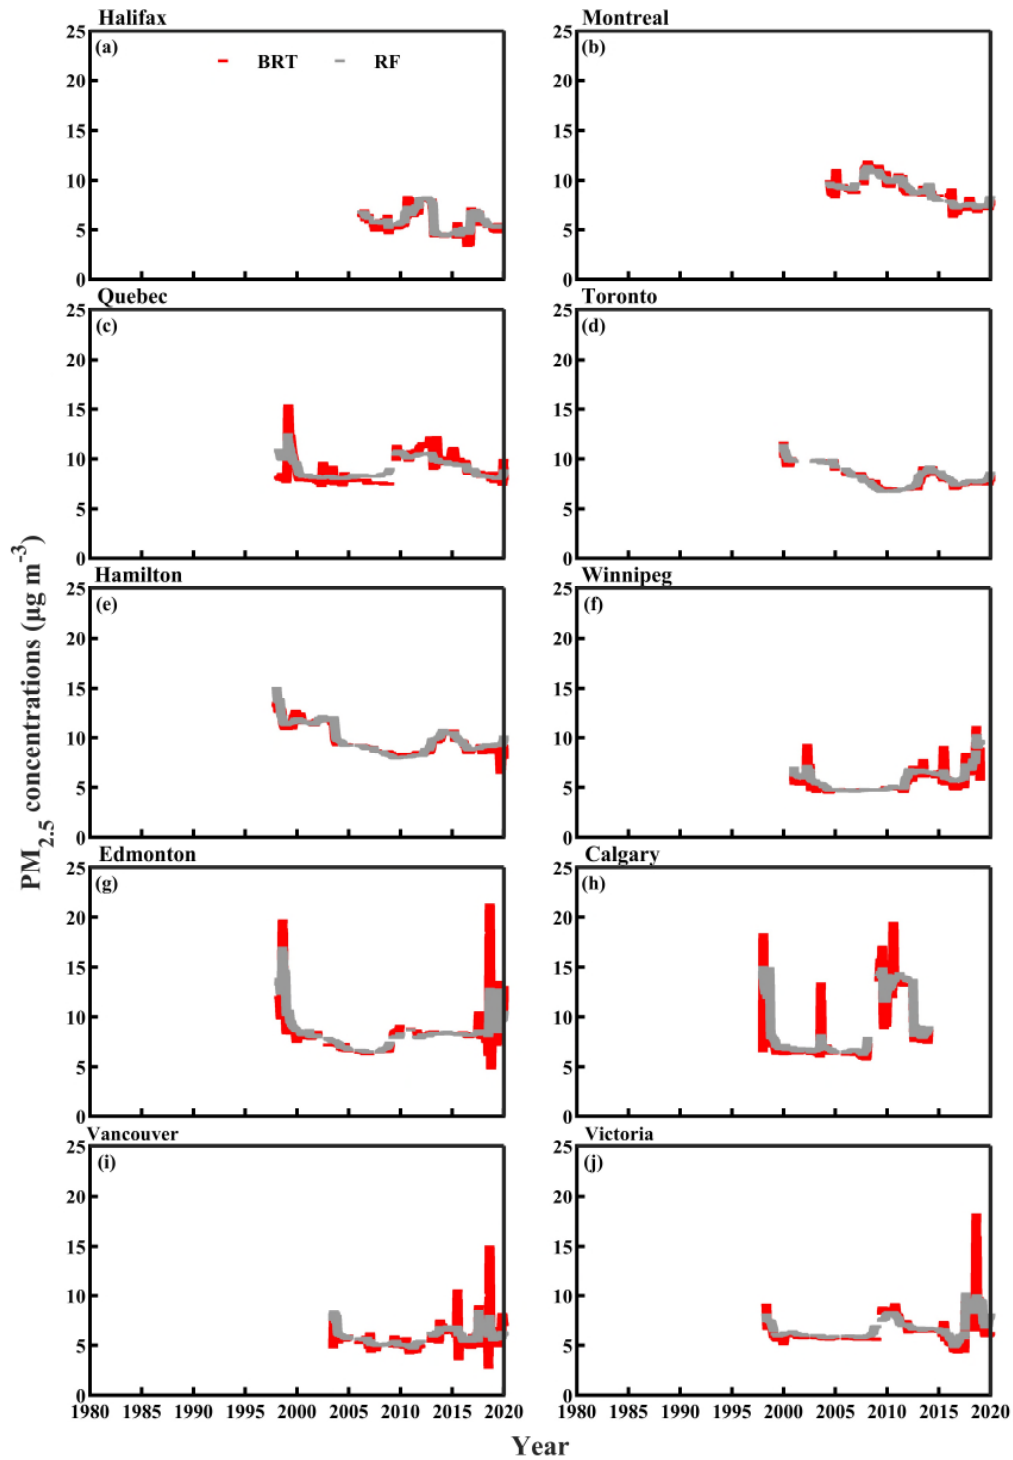

Fig. S7. Average and standard deviation of 95<sup>th</sup>-100<sup>th</sup> percentile concentrations of PM<sub>2.5</sub> in ten Canadian cities.

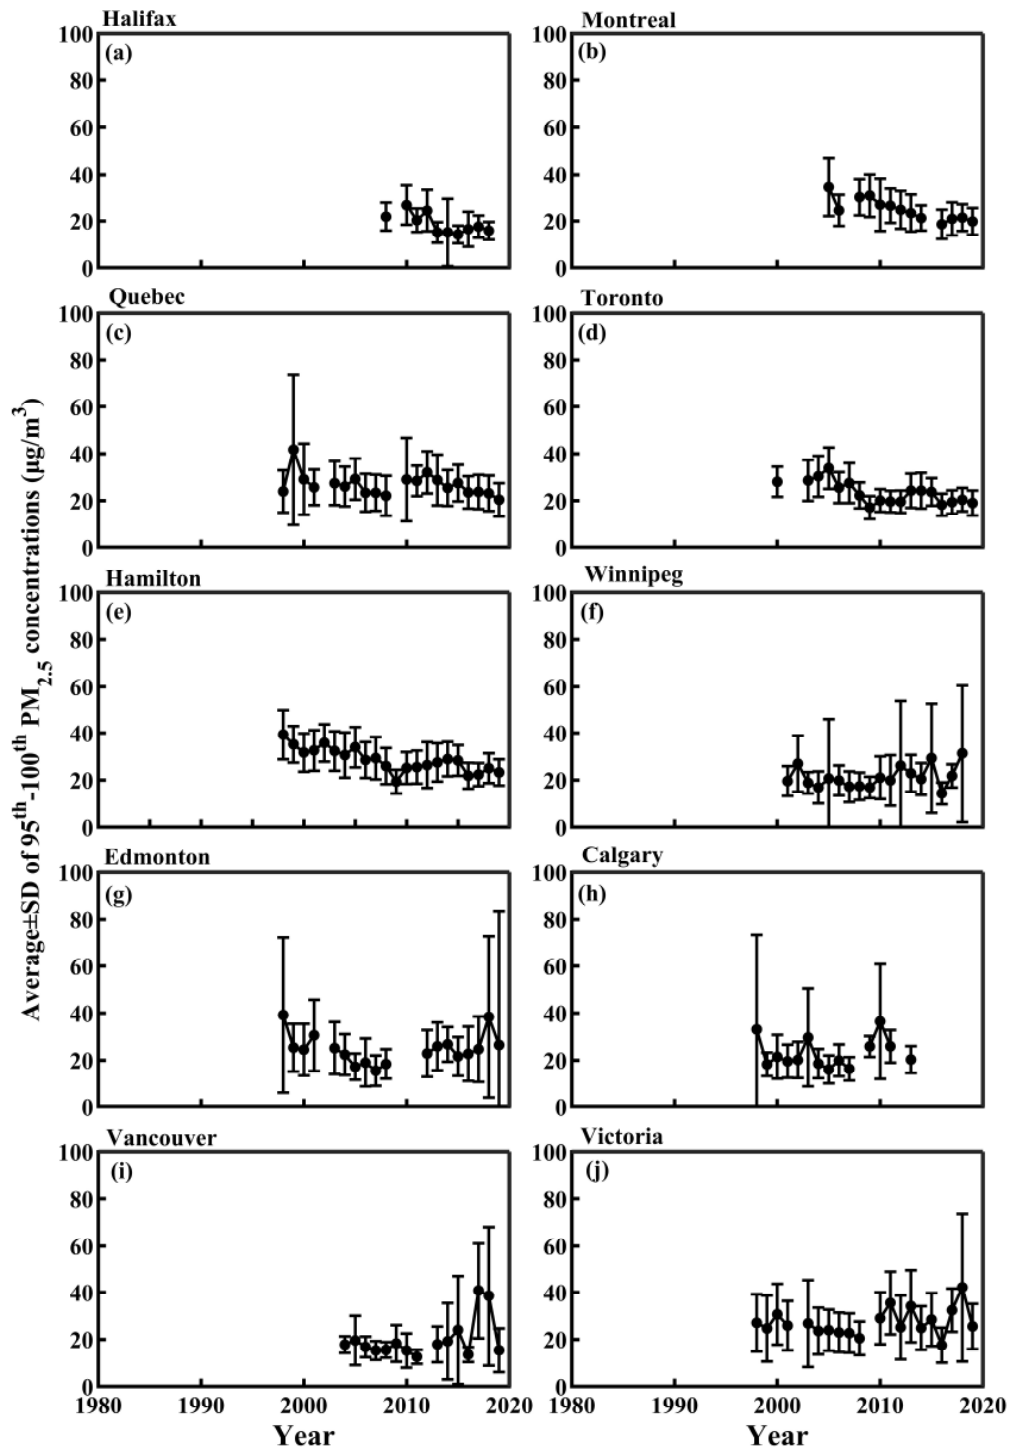

Fig. S8. BRTs-deweathered and RF-deweathered hourly mixing ratios of  $O_3$  (left column) and  $NO_2+O_3$  (right column) at the high level  $\geq 40$  ppb in five western Canadian cities.

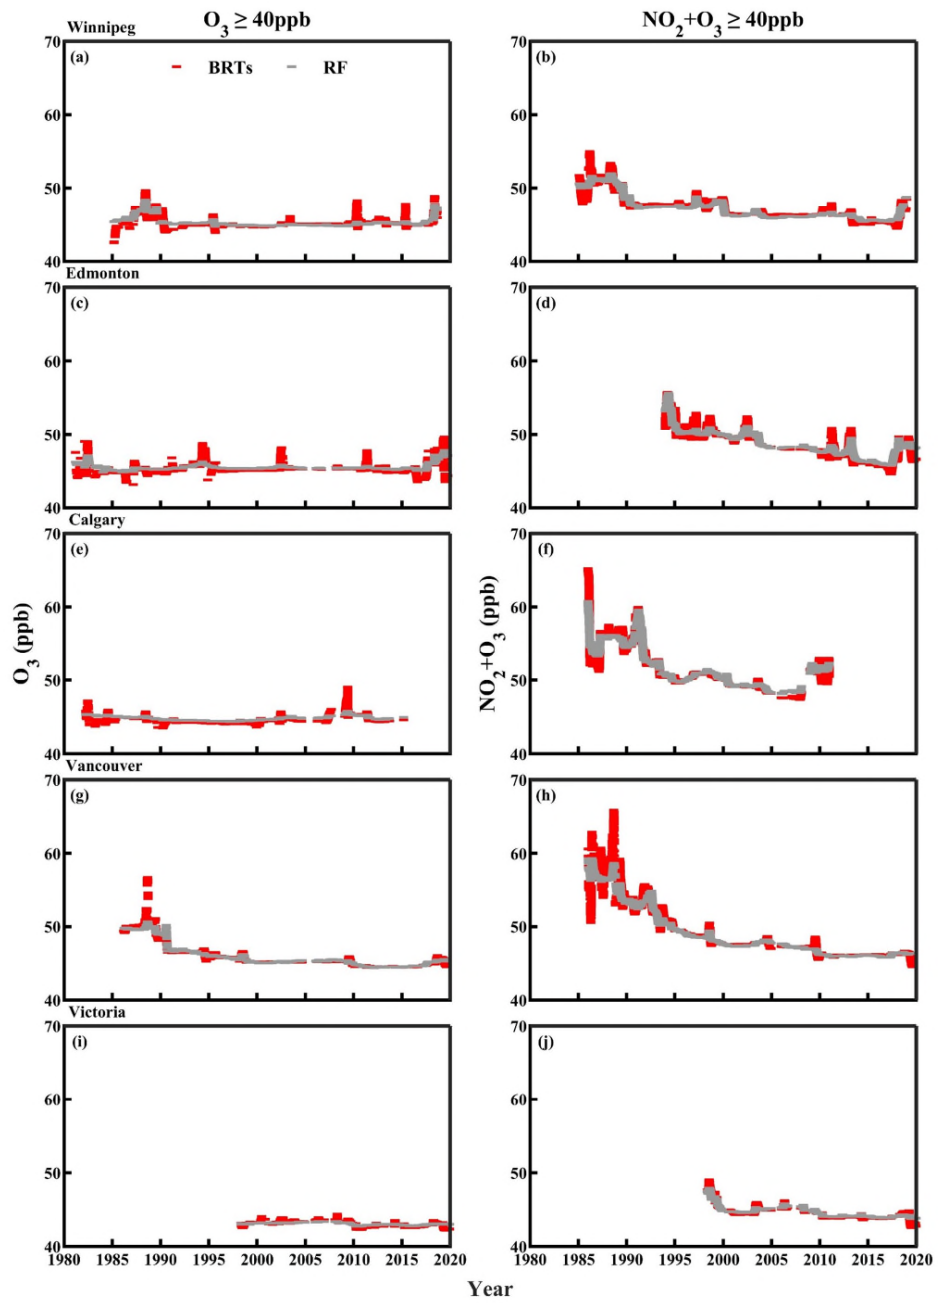

Fig. S9. The calculated AQHI in five eastern Canadian cities (left column shows original AQHI; right column shows annual average of AQHI and percentages of AQHI  $\geq 7$  and  $\geq 10$ ).

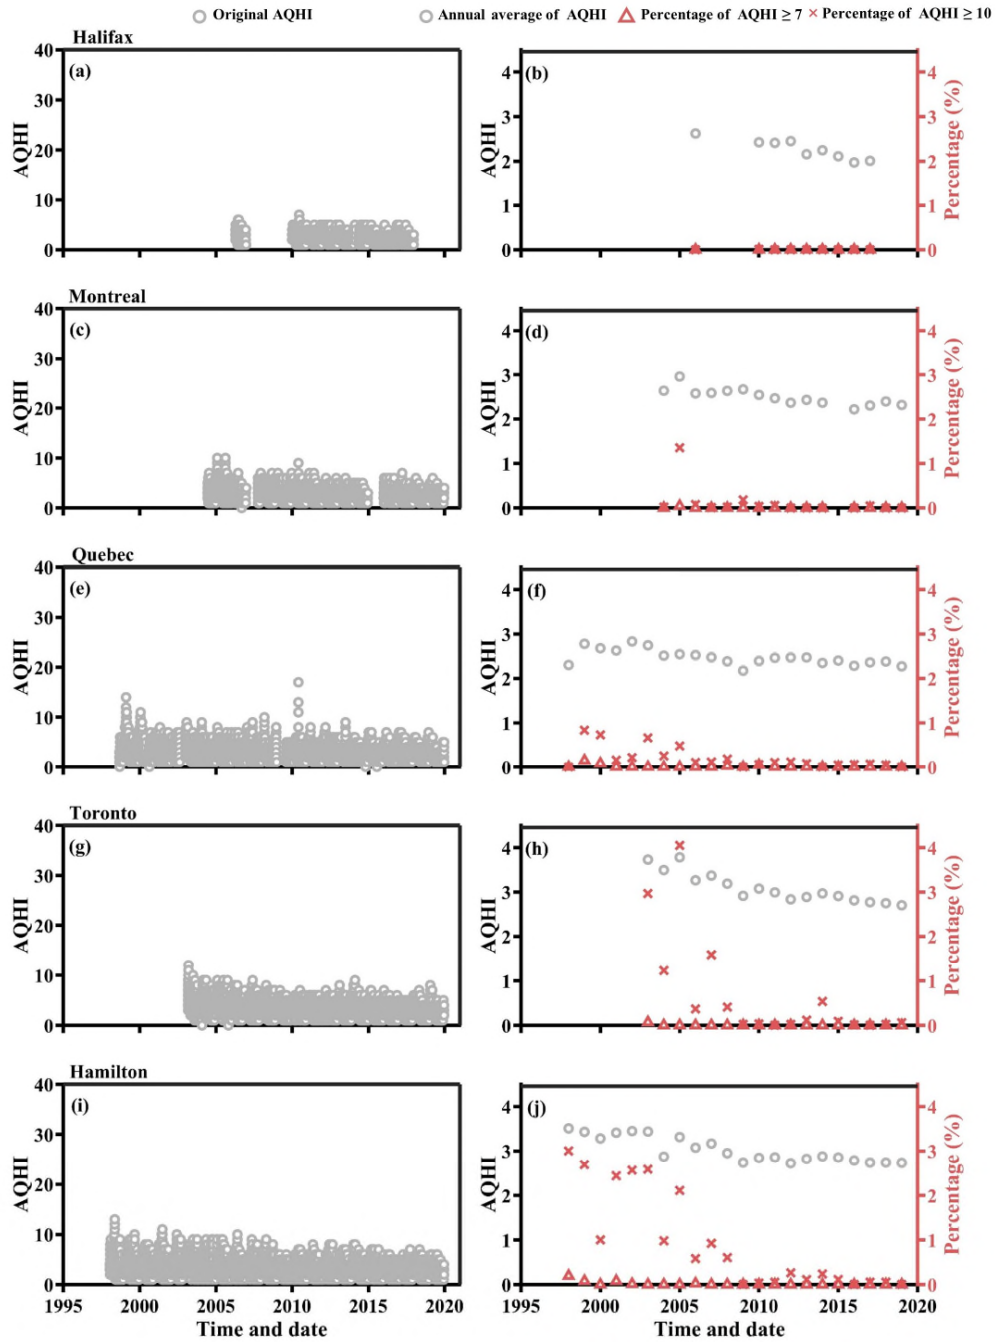

Fig. S10. The calculated AQHI in five western Canadian cities (left column shows original AQHI; right column shows annual average of AQHI and percentages of AQHI  $\geq 7$  and  $\geq 10$ ).

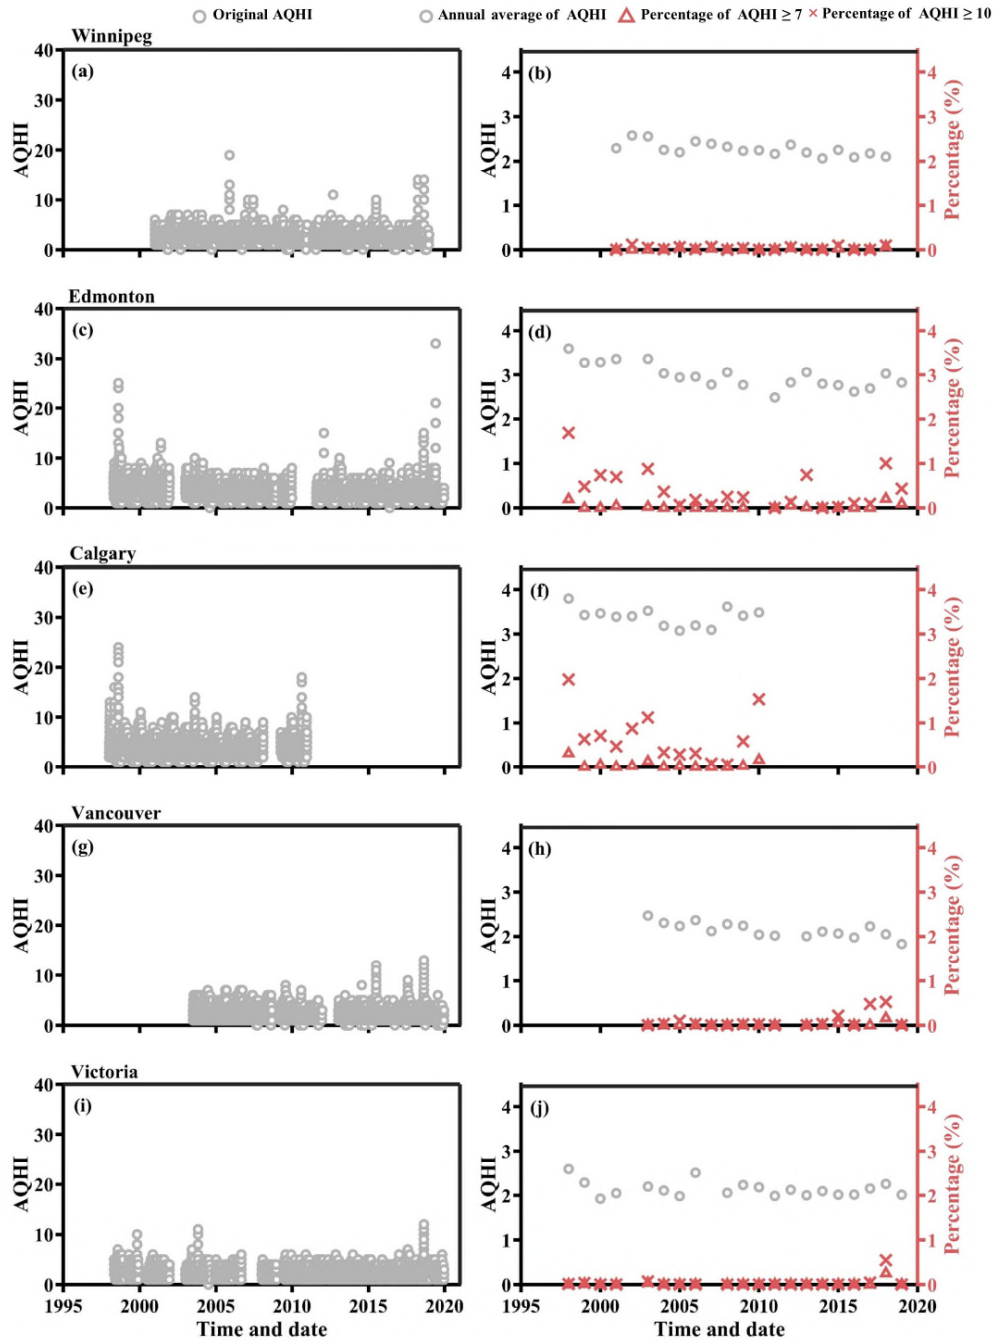

Supplement: Supplementary file [file egusphere-2023-2968-AC1-supplement.pdf]
